# Supplementary material
Source: PubMed Central journal article supplement (PMC6151328)
Supplement: BPH-175-3876-s001.pdf [file BPH-175-3876-s001.pdf]

## Supplementary figure 1

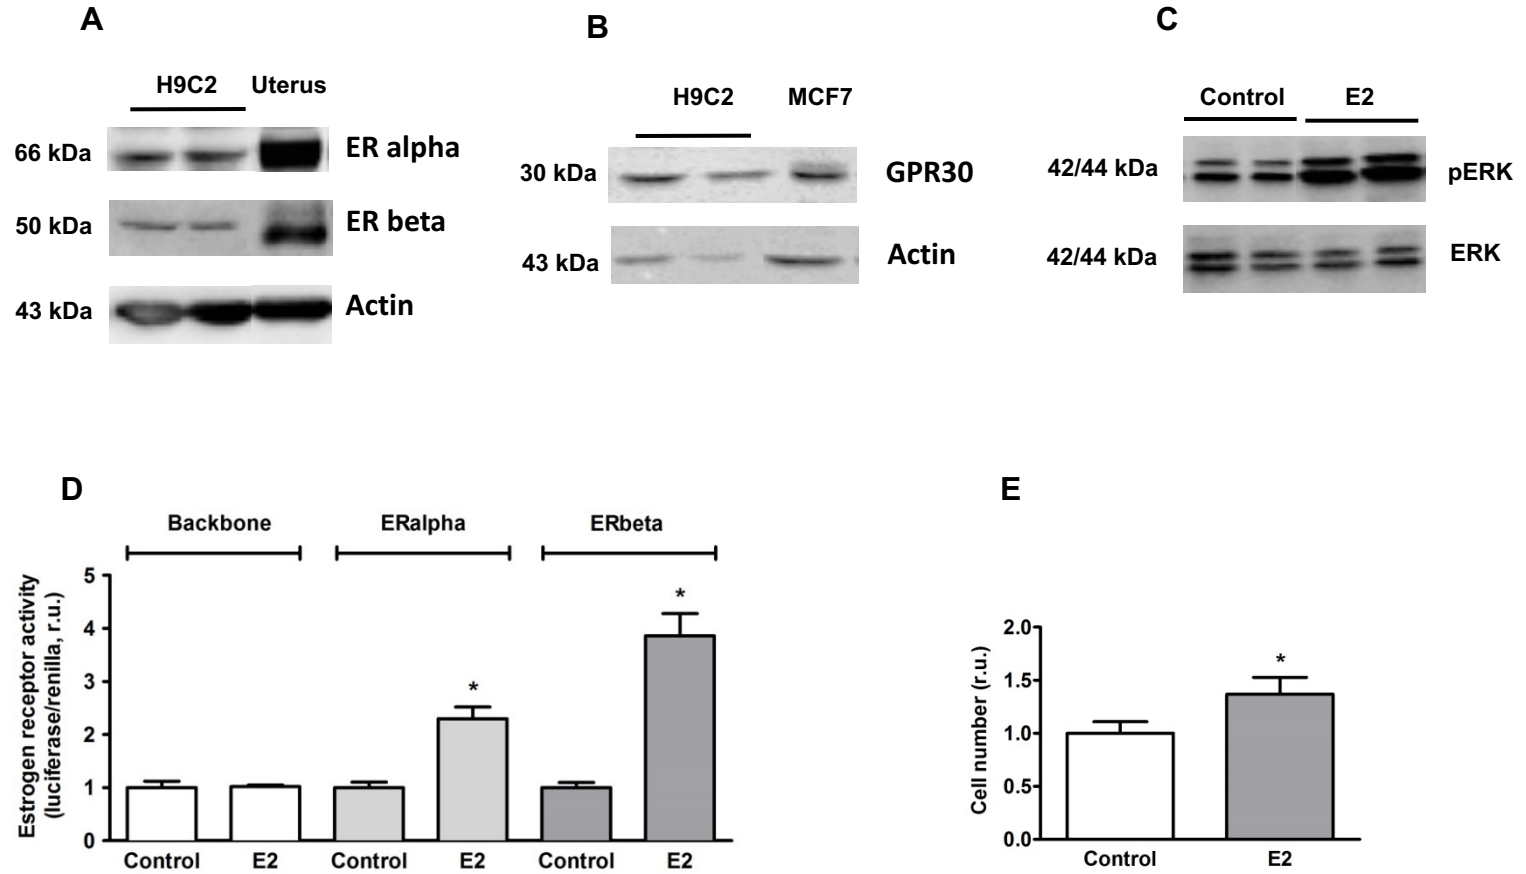

## Supplementary figure 2

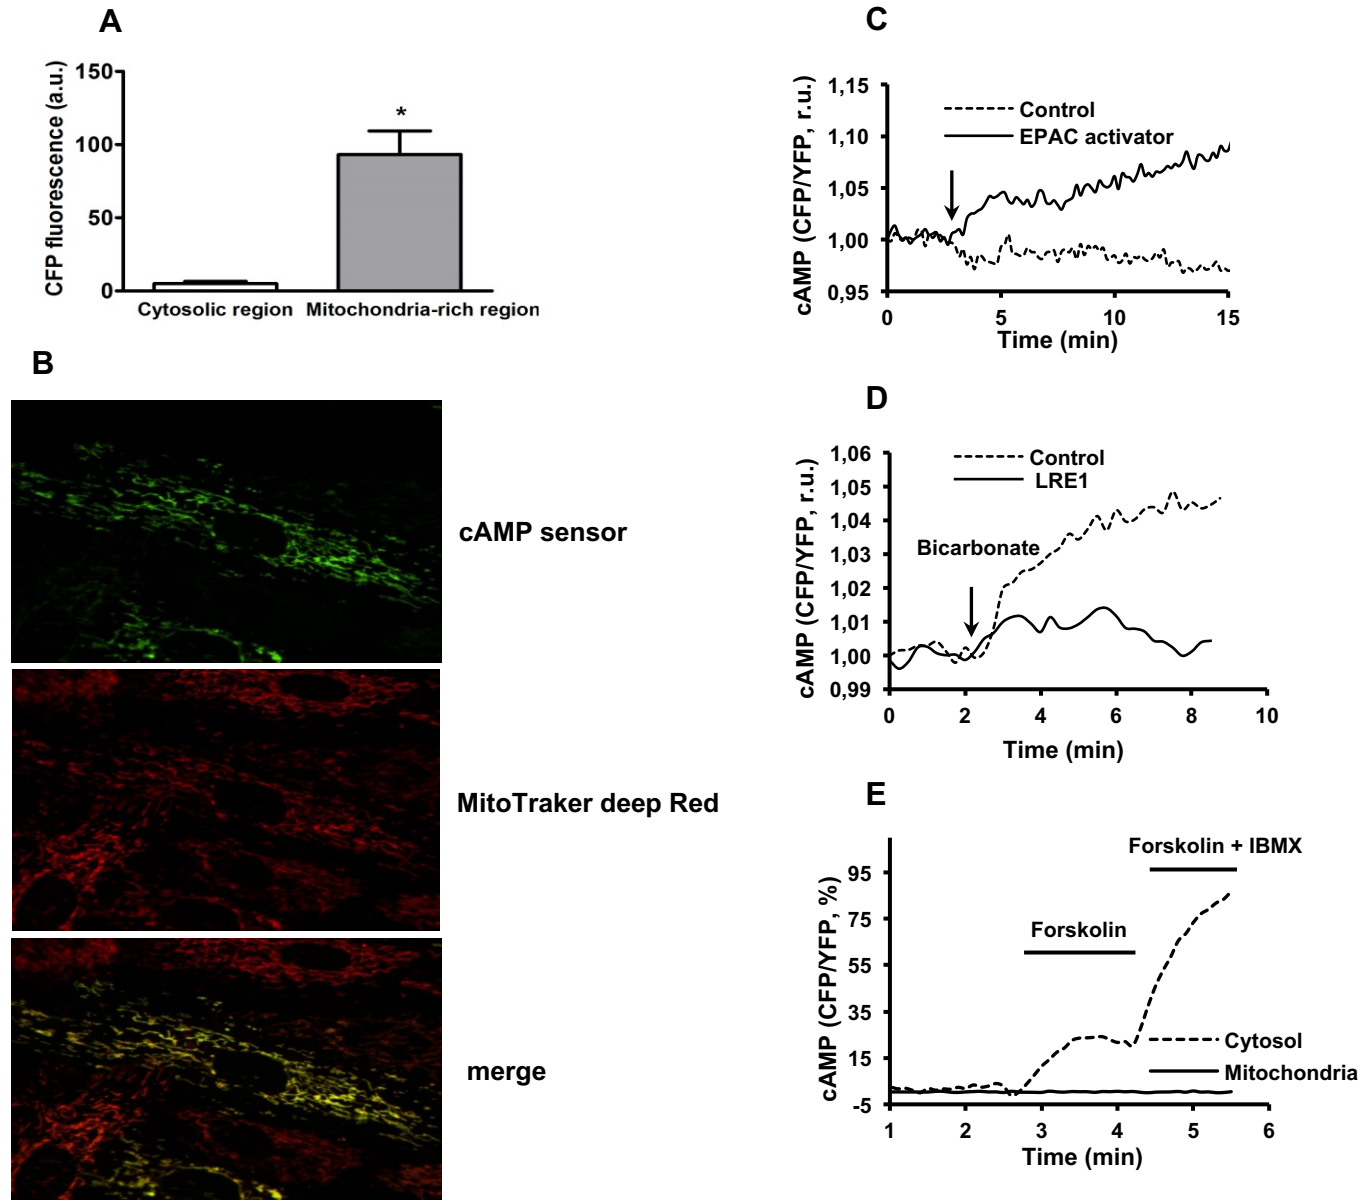

### Supplementary figure 3

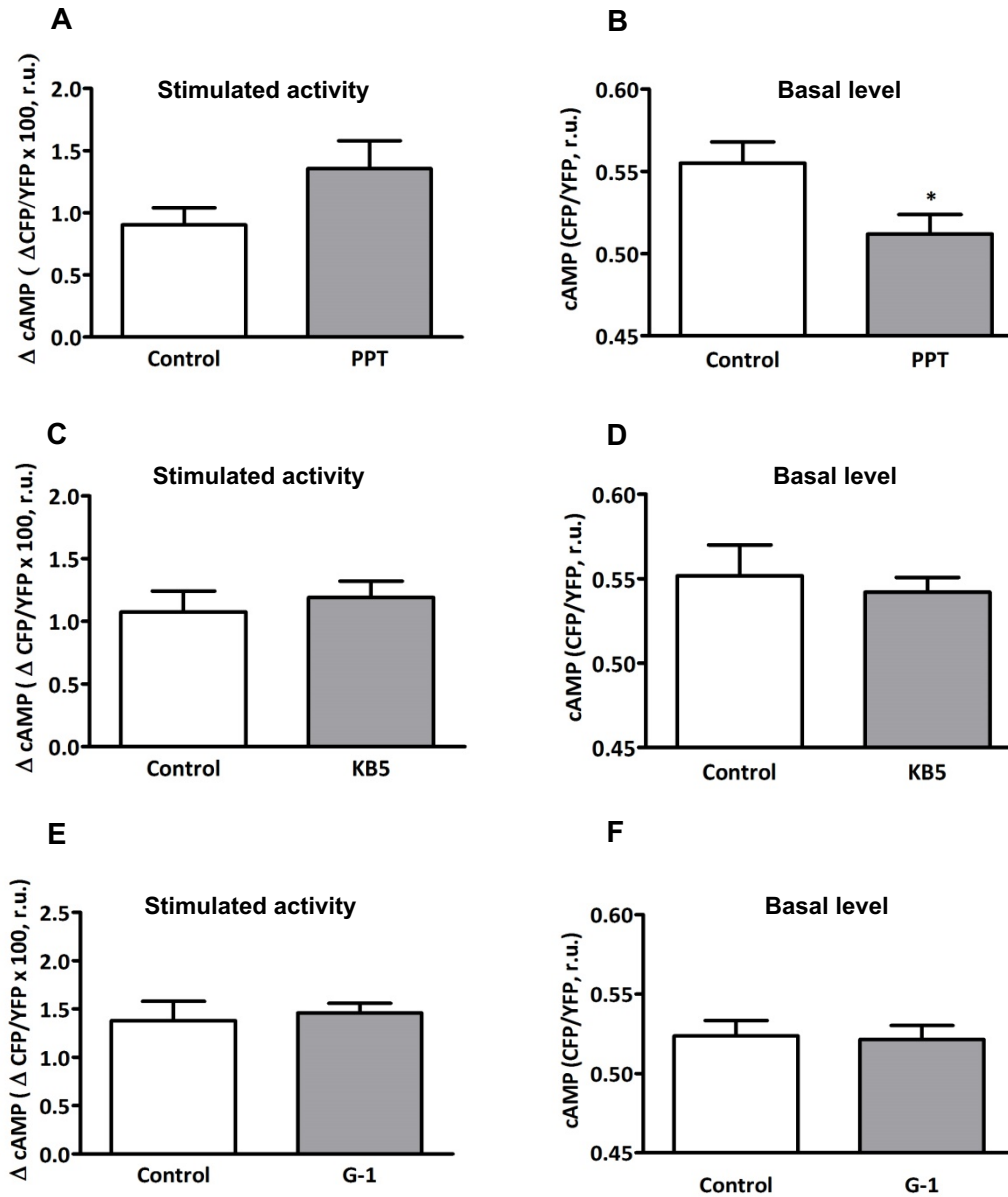

## Supplementary figure 4

**A**

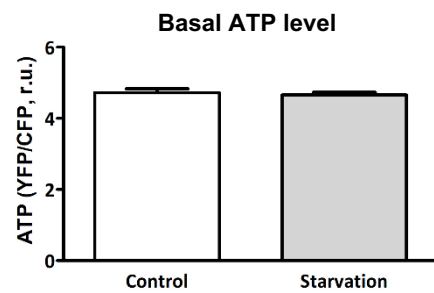

**B**

**Control**

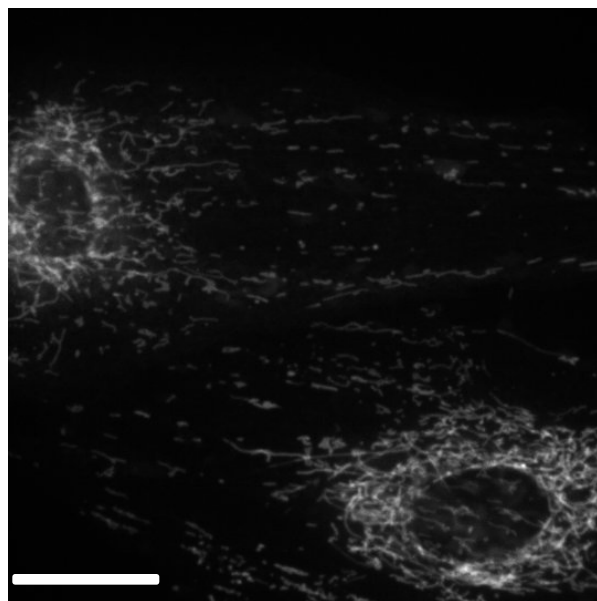

**Starvation**

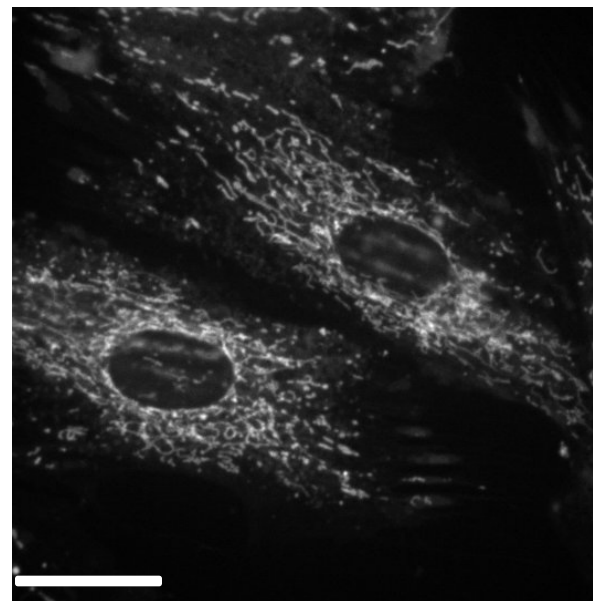

## Supplementary figure legends

**Supplementary Fig. 1 (A, B)** Western blot expression analysis of estrogen receptor (ER) alpha, beta and GRP30 in H9C2 cells. The uterus was used as a positive control for estrogen receptors alpha and beta, while MCF7 cells were used as a positive control for GRP30. Data are representative of three independent experiments with similar results. **(C)** Western blot analysis of phosphorylated ERK1/2 (pERK) performed with H9C2 cells after treatment with 30 nmol/l estradiol (E2) or vehicle (Control) for 24 h. Data are representative of three independent experiments with similar results. **(D)** Analysis of estradiol-induced activation of estrogen receptors performed in H9C2 cells overexpressing estrogen receptor alpha or beta. Cells were treated with 30 nmol/l estradiol (E2) or vehicle (Control) for 24 h. Values are means  $\pm$  SEM. n=8. \*P<0.05 vs. corresponding Control. **(E)** Analysis of cell number (normalized to Control) after treatment with 30 nmol/l estradiol (E2) or vehicle (Control) for 24 h. Values are means  $\pm$  SEM. n = 6. \*P < 0.05 vs Control.

**Supplementary Fig. 2** Characterization of mitochondria-targeted cAMP probe expressed in H9C2 cells. **(A)** Statistical analysis of CFP fluorescence obtained in H9C2 cells transfected with mitochondria-targeted cAMP probe 4mtH30 from mitochondria-free, i.e., cytosolic, or mitochondria-rich regions. Values are means  $\pm$  SEM. n = 4. **(B)** Representative fluorescent images of H9C2 cells transfected with EPAC-based mitochondria-targeted cAMP probe 4mtH30 (upper panel, green) and stained with MitoTracker deep Red (middle panel, red). The merge image (lower panel) demonstrates a high level of 4mtH30 and MitoTracker deep Red co-localization (yellow). **(C)** Representative kinetics of mitochondrial cAMP level observed in H9C2 cells after treatment with either 200  $\mu$ mol/l EPAC activator (8-pCPT2'-O-Me-cAMP) or vehicle (Control). Values are means  $\pm$  SEM. n=4. \*P<0.05. Arrow indicates the start of treatment. **(D)** Representative kinetics of mitochondrial cAMP level observed in H9C2 cells under treatment with 50 mmol/l bicarbonate. Cells were pretreated for 30 min with either 100  $\mu$ mol/l LRE1 (a sAC inhibitor) or vehicle (DMSO). Values are means  $\pm$  SEM. n=4. \*P<0.05 **(E)** Representative kinetics of cytosolic (transfection with non-targeted H30 probe) or mitochondrial (transfection with mitochondria-targeted 4mtH30 probe) cAMP observed in a H9C2 cell under treatment with forskolin (40  $\mu$ mol/l) and IBMX (200  $\mu$ mol/l). Units are presented in % and were calculated as  $(R-R_{min})/(R_{max}-R_{min}) * 100\%$ , where  $R=CFP/YFP$ ,  $R_{min}=R$  before treatment,  $R_{max}=$  maximal R after treatment with forskolin and IBMX. Values are means from three experiments.

**Supplementary Fig. 3** Effect of ER agonists on mitochondrial cAMP. Statistical analysis of mitochondrial cAMP elevation (Stimulated activity) induced by 50 mmol/l bicarbonate **(A)** and basal cAMP level **(B)** were measured in H9C2 cells transfected with 4mtH30 sensor and either pretreated with 1 nmol/l estrogen receptor alpha agonist (PPT) or vehicle (Control) for 24 h. Values are means  $\pm$  SEM. n=7. \*P < 0.05. Statistical analysis of mitochondrial cAMP elevation (Stimulated activity) induced by 50 mmol/l bicarbonate **(C)** and basal cAMP level **(D)** measured in H9C2 cells, either pretreated with 10 nmol/l estrogen receptor beta agonist (KB5) or vehicle (Control) for 24 h. Values are means  $\pm$  SEM. n=10. Statistical analysis of mitochondrial cAMP elevation (Stimulated activity) induced by 50 mmol/l bicarbonate **(E)** and basal cAMP level **(F)** measured in H9C2 cells, either pretreated with 10 nmol/l GRP30 agonist (G-1) or vehicle (Control) for 24 h. Values are means  $\pm$  SEM. n=10.

**Supplementary Fig. 4** Effect of FBS reduction on cellular ATP and mitochondrial morphology. **(A)** FRET-based assay of the basal cytosolic ATP measured in H9C2 cells transfected with ATP sensor. Cell were kept for 48 h

either in DMEM supplemented with 10% FBS (Control) or in DMEM supplemented with 2.5% FBS (Starvation). Values are means  $\pm$  SEM. n=5-6. (B) Representative fluorescent images of H9C2 cells stained MitoTracker green. White scale indicate 30  $\mu$ m. Note, the similar tubular structure, density and predominant perinuclear localization of mitochondria found in Control and Starvation groups. Images are representative from four independent experiments with similar results.
